# Supplementary material for: Sinonasal Malignancy Following Cranial Irradiation: A Scoping Review and Case Report of Sinonasal Teratocarcinosarcoma
Source: PubMed Central journal article supplement — J Neurol Surg Rep. 2024 Jul 5;85(3):e101–11. doi: 10.1055/s-0044-1788310 (PMC11226344; doi:10.1055/s-0044-1788310), 2024-07-05
Supplement: 10-1055-s-0044-1788310-s24mar0014.pdf [file 10-1055-s-0044-1788310-s24mar0014.pdf]

**Supplementary File S1: Complete Search Strategy**

1. exp Brain Neoplasms/
2. exp Central Nervous System Cysts/
3. exp Meningeal Neoplasms/
4. exp Astrocytoma/
5. exp Glioma
6. exp Choroid Plexus Neoplasms/
7. ((brain or central nervous system or cns or intracranial\* or cerebral or infratentorial or supratentorial or meninge\* or leptomeninge\* or arachnoid or colloid) adj3 (tumor\* or tumour\* or neoplasm\* or cancer\* or cyst\* or metastas\* or carcinomatos\* or carcinos\*)),tw,kf.
8. ((supracellar or rathke) adj3 (cyst\*)),tw,kf.
9. (neurocytoma\* or pinealoma\* or astrocytoma\* or astrocytic glioma\* or astroglioma\* or oligoastrocytoma\* or xanthoastrocytoma\* or glioblastoma\* or ependymoma\* or glioma\* or glial cell tumor\* or glial cell tumour\* or ganglioglioma\* or gliosarcoma\* or medulloblastoma\* or oligodendroglioma\* or gliomatosis cerebri or xanthoastrocytoma\* or astroblastoma\* or gangliocytoma\* or neuronal tumor\* or neuronal tumour\* or neurocytoma\* or liponeurocytoma\* or subependymoma\*),tw,kf.
10. (choroid plexus neoplasm\* or diffuse intrinsic pontine glioma or dipg).tw,kf.
11. (atypical teratoid rhabdoid tumour\* or atypical teratoid rhabdoid tumor\*).tw,kf.
12. exp Germinoma/
13. (germinoma\* or dysgerminoma\* or seminoma\*).tw,kf.
14. Carcinoma, Embryonal/
15. (embryo\* adj3 carcinoma\*).tw,kf.
16. chordoma/ or teratoma/ or pinealoma/ or neuroma/ or neurofibroma/ or paraganglioma, extra-adrenal/ or meningioma/
17. (chordoma\* or (teratoma\* or dysembryoma\* or teratoid tumor\* or teratoid tumour\*) or (pinealoma\* or pineal neoplasm\* or (pineal adj3 tumor\*) or (pineal adj3 tumour\*) or pineoblastoma\* or pineocytoma\*) or neuroma\* or neurofibroma\* or ((extra-adrenal or non-chromaffin or extra adrenal or non chromatin) adj3 paraganglioma\*) or chemodectoma\* or (meningioma\* or meningiomatos\*)),tw,kf.
18. ((fibroblastic tumor\* or fibroblastic tumour\* or myofibroblastic tumour\* or myofibroblastic tumor\* or hemangioma\* or lipoma\* or hamartoma\* or vascular malformation\* or hemangioblastoma\* or chondrosarcoma\* or chondroma\* or sarcoma\* or lymphoma\* or histiocytic tumour\* or histiocytic tumor\*) and (central nervous system or CNS or mening\* or brain or intracranial\*)),tw,kf.
19. exp Rhabdomyosarcoma, Embryonal/
20. (embryo\* adj3 rhabdomyosarcoma\*).tw,kf.
21. (yolk sac tumor\* or yolk sac tumour\* or endodermal sinus tumor\* or endodermal sinus tumour\*).tw,kf.
22. choriocarcinoma, non-gestational/ or craniopharyngioma/ or granular cell tumor/ or pituitary neoplasms/
23. (((non-gestation\* or non gestation\*) adj3 choriocarcinoma\*) or (craniopharyngioma\* or (rathke\* adj3 (neoplasm\* or tumor\* or tumour\*))) or granular cell tumor\* or granular cell tumour\* or granular cell myoblastoma\* or (pituitary adj3 (neoplasm\* or adenoma\* or cancer\* or carcinoma\* or tumor\* or tumour\*))),tw,kf.
24. (pituitary blastoma\* or pituicytoma\* or sellar tumor\* or sellar tumour\*).tw,kf.
25. 1 or 2 or 3 or 4 or 5 or 6 or 7 or 8 or 9 or 10 or 11 or 12 or 13 or 14 or 15 or 16 or 17 or 18 or 19 or 20 or 21 or 22 or 23 or 24
26. exp Cranial Irradiation/
27. exp Radiotherapy/
28. exp Radiation/
29. exp Chemoradiotherapy/
30. exp Neoadjuvant Therapy/
31. (cranial irradiation\* or (pituitary adj3 irradiation\*) or (radiotherap\* or radiation therap\* or radiation treatment\* or brachytherap\* or curietherap\* or radioisotope plaque therap\* or craniospinal irradiation\* or spinocranial irradiation\* or heavy ion therap\* or carbon ion therap\* or irradiation\* or immunoradiotherap\* or radioimmunotherap\* or radiosurger\* or (stereotactic adj3 (radiation\* or radiosurger\* or radiotherap\*))) or radiation or (chemoradiotherap\* or radiochemotherap\*) or (neoadjuvant adj3 (radiation\* chemoradiotherap\* or chemoradiation\* or radiotherap\* or therap\*))),tw,kf.
32. 26 or 27 or 28 or 29 or 30 or 31
33. exp Paranasal Sinus Neoplasms/
34. exp Nose Neoplasms/
35. ((sinonasal or nasal or sinus or nose or paranasal or olfactory) adj3 (cancer\* or malignanc\* or neoplasm\* or squamous cell carcinoma\* or adenocarcinoma\* or adenoid cystic carcinoma\* or undifferentiated carcinoma\* or mucosal melanoma\* or neuroendocrine carcinoma\* or lymphoma\* or neuroblastoma\*)),mp.
36. (esthesioneuroblastoma\* or inverted papilloma\*).tw,kf.
37. 33 or 34 or 35 or 36
38. 25 and 32 and 37
